# Supplementary material
Source: publisher figshare collection journal article supplement (https://frontiersin.figshare.com/ndownloader/files/23012333)
Supplement: Supplementary file [file 23012333]

A

|                          |                                                                   | CAA1 mAb   |            |            |
|--------------------------|-------------------------------------------------------------------|------------|------------|------------|
| Structural Attribute     | Analytical Method                                                 | SIgA1      | SIgA2      | dIgA2      |
| Conformational Stability | T <sub>m</sub> value by intrinsic fluorescence spectroscopy, (°C) | 72.0 ± 0.4 | 79.0 ± 0.5 | 78.5 ± 0.7 |
|                          | (n=3 ± SD)                                                        |            |            |            |
| Relative Solubility      | PEG precipitation assay, (% PEG midpoint)                         | 5.2 ± 0.1  | 5.1 ± 0.1  | 6.2 ± 0.1  |
|                          | (n=2 ± data range)                                                |            |            |            |
| Molecular Size           | % Main species by SV-AUC, (%) (~11 Svedbergs)                     | 27 ± 1     | 7 ± 1      | 26 ± 2     |
|                          | (n=2 ± data range)                                                |            |            |            |
|                          | Higher molecular weight species by SV-AUC, (%) (>12 Svedbergs)    | 67 ± 2     | 91 ± 4     | 64 ± 2     |
|                          | (n=2 ± data range)                                                |            |            |            |
|                          | Lower molecular weight species SV-AUC, (%) (<8 Svedbergs)         | 6 ± 1      | 2 ± 1      | 10 ± 1     |
|                          | (n=2 ± data range)                                                |            |            |            |
| Glycosylation            | Total Carbohydrate Analysis, (%)                                  | 38.9 ± 0.2 | 30.7 ± 0.1 | 32.0 ± 0.1 |
|                          | (n=2 ± data range)                                                |            |            |            |
|                          | N-Glycan Oligosaccharide Analysis, (# of N-glycans)               | 20         | 21         | 21         |
|                          | (n=3)                                                             |            |            |            |

B

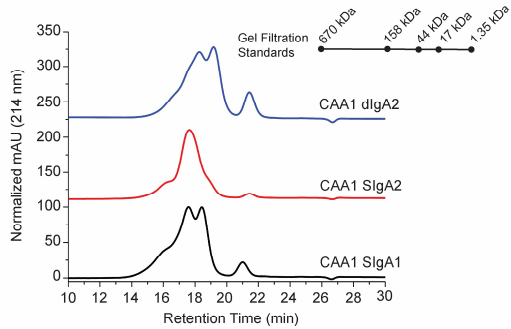

C

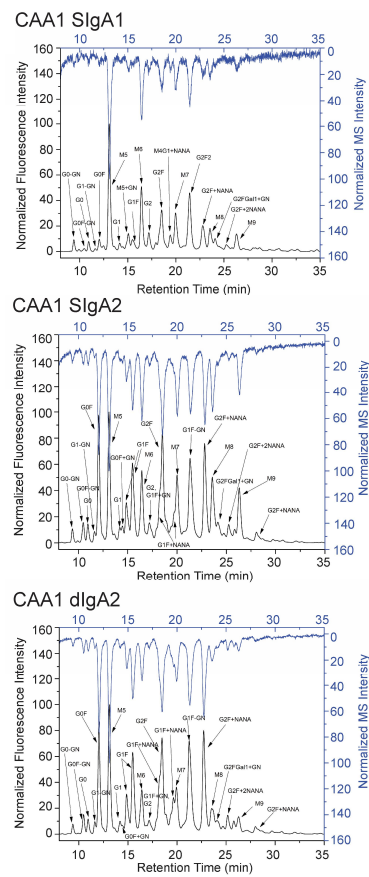

D

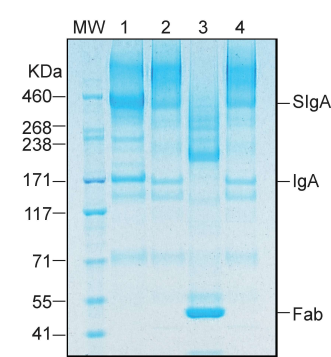

### Supplemental Figure 3. Structural characterization of recombinant SIgA.

(A) Summary of the biophysical characteristics of CAA1 mAb in the SIgA1, SIgA2, and dIgA2 formats. Various measurements included conformational stability by intrinsic fluorescence spectroscopy vs temperature, relative solubility by PEG precipitation assay, size analysis by SV-AUC and glycosylation by total carbohydrate analysis and N-glycan oligosaccharide analysis. Sample measurements were performed in PBS, pH 7.2 with mean (n=2 except T<sub>m</sub> values and N-linked glycan analysis n=3) ± range. (B) Representative size exclusion chromatograms. Absorbance traces (214 nm) of the various CAA1 mAbs as a function of retention time of SEC column are shown. Gel filtration standards are shown for comparison. (C) Representative N-Glycosylation analysis of CAA1 SIgA1, SIgA2, and dIgA2 mAbs. Representative profiles of Fluor-MS N-linked glycans that were released from mAbs as measured by fluorescence and mass spectrometry as indicated. All data are presented as mean ± SD; n = 3. A summary of the percentage of the N-glycans for each mAb is indicated in the table. The percentages are the mean of three measurements and the standard deviation of each measurement was ≤1.5%. (D) Denaturing non-reducing gel of CAA1 SIgA1 and SIgA2 incubated over-night (18 hours) with PBS or with rIgA protease (Igase Pro-Pro-Y-Pro) from *Neisseria gonorrhoeae*. (1: SIgA1 + PBS; 2: SIgA2 + PBS; 3: SIgA1+Igase; 4: SIgA2+Igase).

| Common Name  | Oxford Notation | CFG | Percentage (%) in CAA1 SIgA1 | Percentage (%) in CAA1 SIgA2 | Percentage (%) in CAA1 dIgA2 |
|--------------|-----------------|-----|------------------------------|------------------------------|------------------------------|
| G0-GN        | A1              |     | 1.4                          | 0.8                          | 0.6                          |
| G0F-GN       | FA1             |     | 0.5                          | 1.4                          | 1.4                          |
| G0           | A2              |     | 1.3                          | 1.2                          | 1.1                          |
| G1-GN        | A1G1            |     | 0.4                          | 0.6                          | 0.8                          |
| G0F          | FA2             |     | 1.9                          | 8.5                          | 8.1                          |
| G0F+GN       | FA3             |     | -                            | 1.0                          | 0.6                          |
| G1           | A2G1            |     | 1.3                          | 1.0                          | 1.0                          |
| G1F          | FA2G1           |     | 2.9                          | 10.1                         | 12.0                         |
| G1F-GN       | FA1G1           |     | -                            | 10.7                         | 12.9                         |
| G1F+GN       | FA3G1           |     | -                            | 2.2                          | 1.7                          |
| G2           | A2G2            |     | 3.5                          |                              |                              |
| G2F          | FA2G2           |     | 10.0                         | 9.6                          | 8.4                          |
| G2F2         | FA2F1G2         |     | 12.7                         | -                            | -                            |
| G2FGa1+GN    | FA2BG2Ga1       |     | 2.1                          | 2.2                          | 1.8                          |
| G1F+NANA     | FA2G1S1         |     | -                            | 4.7                          | 8.3                          |
| G2F+NANA     | FA2G2S1         |     | 6.8                          | 10.7                         | 13.0                         |
| G2F+2NANA    | FA2G2S2         |     | 1.7                          | 1.9                          | 2.1                          |
| Man4G1+NAN A | M4A1G1S1        |     | 3.2                          | -                            | -                            |
| Man5         | M5              |     | 19.5                         | 9.0                          | 10.4                         |
| Man5+GN      | M5A1            |     | 3.5                          | -                            | -                            |
| Man6         | M6              |     | 10.9                         | 6.4                          | 4.9                          |
| Man7         | M7              |     | 7.6                          | 6.0                          | 4.8                          |
| Man8         | M8              |     | 5.0                          | 6.5                          | 3.8                          |
| Man9         | M9              |     | 3.8                          | 5.5                          | 2.1                          |
